# Supplementary material for: Cultivable microbial community in 2-km-deep, 20-million-year-old subseafloor coalbeds through ~1000 days anaerobic bioreactor cultivation
Source: Springer Nature journal article supplement (doi:10.1038/s41598-019-38754-w), 2019-02-19
Supplement: 41598_2019_38754_MOESM1_ESM.pdf [file 41598_2019_38754_MOESM1_ESM.pdf]

1  
2  
3  
4  
5  
6  
7  
8  
9  
10  
11  
12  
13  
14  
15  
16  
17  
18  
19  
20  
21  
22  
23  
24  
25  
26  
27  
28  
29  
30  
31  
32  
33  
34  
35  
36  
37  
38

**Supplementary Information**

**Cultivable microbial community in 2-km-deep, 20-million-year-old seafloor coalbeds through ~1000 days anaerobic bioreactor cultivation**

Hiroyuki Imachi<sup>1,2\*</sup>, Eiji Tasumi<sup>1</sup>, Yoshihiro Takaki<sup>1,3</sup>, Tatsuhiko Hoshino<sup>2,4</sup>, Florence Schubotz<sup>5</sup>, Shuchai Gan<sup>5</sup>, Tzu-Hsuan Tu<sup>1,6</sup>, Yumi Saito<sup>1</sup>, Yuko Yamanaka<sup>1</sup>, Akira Ijiri<sup>2,3</sup>, Yohei Matsui<sup>2,3</sup>, Masayuki Miyazaki<sup>1</sup>, Yuki Morono<sup>2,4</sup>, Ken Takai<sup>1,2</sup>, Kai-Uwe Hinrichs<sup>5</sup>, and Fumio Inagaki<sup>2,4,7</sup>

<sup>1</sup> Department of Subsurface Geobiological Analysis and Research (D-SUGAR), Japan Agency for Marine-Earth Science and Technology (JAMSTEC), Yokosuka, Kanagawa 237-0061, Japan.

<sup>2</sup> Research and Development Center for Submarine Resources, JAMSTEC, Yokosuka, Kanagawa 237-0061, Japan.

<sup>3</sup> Project Team for Development of New-generation Research Protocol for Submarine Resources, JAMSTEC, Yokosuka, Kanagawa 237-0061, Japan.

<sup>4</sup> Kochi Institute for Core Sample Research, JAMSTEC, Nankoku, Kochi 783-8502, Japan.

<sup>5</sup> MARUM Center for Marine Environmental Sciences and Department of Geosciences, University of Bremen, D-28359 Bremen, Germany.

<sup>6</sup> Institute of Oceanography, National Taiwan University, Taipei 106, Taiwan.

<sup>7</sup> Research and Development Center for Ocean Drilling Science, JAMSTEC, Yokohama, Kanagawa 236-0001, Japan.

\*Corresponding author: Hiroyuki Imachi

**Supplementary Texts 1 and 2, Figures S1-S5.**

## 39 **Supplementary Text 1**

40 **Reasons for providing organic substances to the DHS reactor.** In addition to lignite  
41 particles, we also provided acetate, propionate, butyrate, and yeast extract as potential energy  
42 and carbon sources for the enrichment in the DHS reactor. Acetate constitutes an  
43 energy/carbon source for aceticlastic methanogens and it is also an important carbon source  
44 for many hydrogenotrophic methanogens<sup>83</sup>. Yeast extract functions as a growth requirement  
45 for many methanogens and anaerobic heterotrophs<sup>83</sup>. Propionate and butyrate are expected to  
46 be intermediates of methanogenic biodegradation from coal, which is a complex organic  
47 compound<sup>84</sup>. Therefore, if propionate- and butyrate-degradations occur in the bioreactor,  
48 degradations of high molecule organic compounds derived from coal, such as aromatics, long  
49 chain alkanes, and long chain fatty acids, may be enhanced in terms of thermodynamics for  
50 the entire series of biodegradation reactions from coal to methane. Furthermore, in many  
51 natural anaerobic environments, including the subseafloor coal bed layers, hydrogenotrophic  
52 methanogens should thrive by receiving the H<sub>2</sub> that is provided by heterotrophic H<sub>2</sub>-producing  
53 microorganisms, which catalyze the oxidation of a variety of organic substances<sup>85,86</sup>. The  
54 methanogens utilize the H<sub>2</sub> produced by these heterotrophic bacteria; in return, the bacteria  
55 benefit from the removal of excess H<sub>2</sub> that would otherwise inhibit their growth. This  
56 relationship is commonly referred to as interspecies H<sub>2</sub> transfer<sup>86,87</sup>, with such syntrophic  
57 relationships between methanogens and heterotrophs likely existing in the subseafloor  
58 environment. Therefore, we assumed that the organic substances used in this study might act  
59 to increase metabolic activities of heterotrophic microorganisms and methanogens, which live  
60 in subseafloor coal bed environments.

61

## 62 **References**

- 63 83. Whitman, W.B. *Bergey's Manual of Systematics of Archaea and Bacteria*. Wiley Online  
64 Library. doi: 10.1002/9781118960608 (2015).
- 65 84. Jones, E. J. P., Voytek, M.A., Corum M.D. & Orem W.H. Stimulation of methane  
66 generation from nonproductive coal by addition of nutrients or a microbial consortium.  
67 *Appl. Environ. Microbiol.* **76**, 7013-7022 (2010).
- 68 85. Liu, Y, & Whitman, W.B. Metabolic, phylogenetic, and ecological diversity of the  
69 methanogenic *Archaea*. *Ann. N. Y. Acad. Sci.* **1125**, 171-189 (2008).
- 70 86. Stams, A.J.M. & Plugge, C.M. Electron transfer in syntrophic communities of anaerobic  
71 bacteria and archaea. *Nat. Rev. Microbiol.* **7**, 568-577 (2009).
- 72 87. Schink, B. Energetics of syntrophic cooperation in methanogenic degradation. *Microbiol.*

73 *Mol. Biol. Rev.* **61**, 262-280 (1997).

74

## 75 **Supplementary Text 2**

76 **DHS bioreactor and operation.** The medium was supplied into the reactor from the top inlet  
77 port using a peristaltic pump (Masterflex L/S tubing pump 7550-50, Cole-Parmer, Vernon  
78 Hills, IL, USA) with viton tubing (Cole-Parmer) and distributed to the sponge carriers by a  
79 distributor unit. The medium then flowed down, passing through the sponge carriers by  
80 gravity, and was finally pumped out of the glass column. A certain amount of the medium  
81 accumulated at the base of the bioreactor column prior to being drained out of the DHS  
82 reactor. The HRT in the reactor was set at 70 h and the medium was supplied intermittently  
83 by an automatic on/off timer (FT-011, Fine Inc., Tokyo, Japan, 1 min/9 min [on/off])  
84 connected to the peristaltic pump to spread the medium to the sponge carriers throughout the  
85 glass column. It is noted that the time for the contact between medium fluid and sponge  
86 carrier/lignite might be shorter than 70 h because a previous study showed that actual HRT  
87 was shorter than theoretical one<sup>88</sup>. The distributor unit was manually rotated at three- or  
88 four-day intervals to diffuse the medium into all of the sponge carriers. The gas phase in the  
89 reactor was sampled from the top portion of the reactor. The DHS reactor was operated under  
90 atmospheric pressure.

91

92 **Chemical analysis.** The temperature, pH and oxidation-reduction potential (ORP) of effluent  
93 seawater were measured using an InPro3250 pH and redox sensor (Mettler Toledo, Columbus,  
94 OH, USA). Methane concentration in the bioreactor headspace was monitored and quantified  
95 using a gas chromatograph (GC-4000, GL Science Inc., Tokyo, Japan) equipped with a  
96 Shincarbon ST 50/80 column (1.0 m × 3.0 mm ID, Shinwa Chem. Ind., Kyoto, Japan) and a  
97 flame ionization detector with N<sub>2</sub> as a carrier gas. The stable carbon and hydrogen isotope  
98 compositions of methane in the sampled gas phase were analyzed as previously described<sup>30</sup>.  
99 Concentrations of dissolved organic carbon (DOC) were measured using a TOC analyzer  
100 (TOC-V WS, Shimadzu, Kyoto Japan) according to manufacturer's instruction.  
101 Concentrations of acetate, propionate, butyrate, and formate in effluent samples were  
102 measured by using a long- and short-chain fatty acid labeling kit (YMC Co., Kyoto, Japan)  
103 and a high performance liquid chromatography system consisted of an SCL-10A VP system  
104 controller, two LC-10Ai pumps, an SIL-20A autosampler, a CTO-10A VP column oven, and  
105 an SPD-10A VP UV-VIS detector (Shimadzu). The measurement conditions were as follows:  
106 column, Nova-Pak® C18 column (4 μm, 3.9 mm × 150 mm, Waters, Milford, MA, USA);

107 mobile phase, (A) water, (B) 0.1 vol% trifluoroacetic acid – acetonitrile; flow rate, 1 ml/min;  
108 gradient program, 2% B for 25 min, 2-9% B for 5 min, 9% B for 65 min, 9-100% B for 5 min,  
109 100% B for 10 min, 100-2% B for 5 min, and 2% B for 5 min; detection, UV 400 nm; column  
110 oven temperature, 45°C. The stable carbon isotope composition of acetate was determined by  
111 means of isotope-ratio-monitoring liquid chromatography mass spectrometry (irm-LCMS),  
112 using a Thermo-Finnigan Delta Plus XP isotope-ratio mass spectrometer connected to LC  
113 IsoLink, as described by Ijiri *et al.* (2012)<sup>89</sup>.

114

115 **DNA extraction, PCR amplification, and SSU rRNA gene tag sequencing analysis.** After  
116 PCR amplification, PCR products were checked for size by electrophoresis on a 1.5% agarose  
117 gel using RedSafe stain (FroggaBio Inc., Toronto, Canada), purified using the ExoSAP-IT  
118 PCR Product Cleanup reagent (Affymetrix Inc., Cleveland, OH, USA), and quantified using a  
119 Quant-iT dsDNA High-Sensitivity Assay Kit (Life Technologies, Carlsbad, CA, USA). Then,  
120 a second PCR amplification was performed to add multiplexing indices and Illumina  
121 sequencing adapters. Ex Taq polymerase (TaKaRa Bio Inc., Kusatsu, Shiga, Japan) was used  
122 for the second PCR amplification. The adapter-attached PCR products were purified with  
123 Agencourt AMPure XP (Beckman Coulter, Brea, CA, USA) and quantified using a Quant-iT  
124 dsDNA High-Sensitivity Assay Kit (Life Technologies). Quality and DNA concentration of  
125 the PCR products were checked using a Bioanalyzer 2100 (Agilent Technologies, Santa Clara,  
126 CA, USA) and real-time PCR using a KAPA Library Quantification Kit (Kapa Biosystems,  
127 Wilmington, MA, USA). The PCR products were subjected to DNA denaturing and sample  
128 loading on a sequencer using MiSeq v3 reagent (Illumina, San Diego, CA, USA) according to  
129 the manufacture's protocol. Sequencing was performed using a MiSeq system (Illumina).

130 Paired-end reads were merged using PEAR<sup>90</sup>. PCR primers were removed from the  
131 merged sequences using Cutadapt v1.10. Low-quality (Q score <30 in over 3% of sequences)  
132 and short (< 150 bp) reads were filtered out using a custom perl script. SSU rRNA gene  
133 amplicon analysis from 30000 sequences sampled randomly was performed using the QIIME  
134 software package<sup>91</sup>. After the removal of chimeric sequences using Usearch61<sup>92</sup> in QIIME,  
135 OTUs were selected at the 97% similarity level using UCLUST<sup>92</sup> and were subsequently  
136 assigned to a taxon (at phylum, class, order, family, and genus levels) by comparison with the  
137 non-redundant 16S rRNA small subunit SILVA128 database. Alpha diversity indices were  
138 estimated using QIIME and non-metric multidimensional scaling (NMDS) analysis was  
139 performed based on the Bray-Curtis distance matrix using the function "metaMDS" from the  
140 vegan package in R (<http://vegan.r-forge.r-project.org>). Rarefaction curves were constructed

141 using the function "rrarefy" from the vegan package in R. In addition to analysis using  
142 conventional 97% cut-off OTUs, we also estimated alpha diversity indices using zero-radius  
143 OTUs obtained with the UNOISE2 algorithm<sup>32</sup>. Toward this end, the paired-end reads were  
144 quality-trimmed with AfterQC<sup>93</sup>. After the trimmed paired-end sequences were merged and  
145 screened by length, primer sequences were removed by using Mothur v.1.39.5<sup>94</sup>. Subsequently,  
146 the obtained high-quality sequence reads were clustered into ZOTUs by using USEARCH  
147 (<https://www.drive5.com/usearch/>).

148 To reveal potential contaminants introduced to the DHS reactor, we used 16S rRNA  
149 gene sequence information obtained from four drill mud samples of the IODP expedition (i.e.,  
150 LMT159, LMT214, LMT27, and LMT372), which have been deposited in the GenBank  
151 Sequence Read Archive under accession numbers SRR1777632–SRR1777635<sup>23</sup>. The drilling  
152 mud sequence reads were cleaned up using the NGS QC Toolkit ver. 2.3<sup>95</sup> and then removed  
153 the PCR primers using Cutadapt v1.10<sup>96</sup>. Taxonomic annotation was performed using QIIME.  
154 Because the tag sequence libraries of the drill mud samples were obtained using different  
155 PCR primers (V1-V3 regions) from the PCR primers used in the present study (V4-V5  
156 regions), the OTUs having the same phylogenetic affiliation with OTUs from the drill mud  
157 samples were defined as the potential contaminants. In addition, we treated core members of  
158 the human microbiome<sup>97</sup> and members of the genus *Candidatus* Nitrosopumilus (an aerobic  
159 ammonium-oxidizing archaea)<sup>98</sup> as potential contaminants.

160

161 **PCR amplification of 18S rRNA gene of reactor enrichment samples.** To evaluate the  
162 microbial eukaryotic community in reactor enrichments, 18S rRNA gene targeting primer  
163 pairs EukA/EukB<sup>99</sup> and Euk1391F (5'-GTACACACCGCCCGTC-3', a variant of a primer  
164 reported by Amaral-Zettler et al., 2009<sup>100</sup>)/EukB were used for PCR amplification. The  
165 conditions of PCR amplification followed the protocols described in a previous study<sup>101</sup> and  
166 The Earth Microbiome Project  
167 (<http://www.earthmicrobiome.org/emp-standard-protocols/18s/>).

168

169 **Isolation of anaerobic microorganisms from the DHS bioreactor.** To isolate anaerobic  
170 microorganisms grown in the DHS reactor, batch-type cultivation was performed in 50 ml  
171 serum vials containing 20 ml media under an atmosphere of N<sub>2</sub>/CO<sub>2</sub> (80/20 [v/v]) without  
172 shaking. The basal medium was the same medium used for the DHS reactor cultivation  
173 without organic compounds and contained one of the following energy sources: (i) each of the  
174 organic substrates in the medium (i.e., butyrate, propionate, acetate, and yeast extract), (ii)

175 each of the methanogenic substrates, such as H<sub>2</sub>/CO<sub>2</sub>, formate, trimethylamine and methanol,  
176 and (iii) a substrate for homoacetogenesis; i.e., H<sub>2</sub>/CO<sub>2</sub> plus 2-bromoethanesulfonate, which is  
177 an inhibitor of methanogenesis (Supplementary Table S8). A mixture of effluent and lignite  
178 particle samples that were collected at 694 days of operation was inoculated into each  
179 medium using a syringe with an 18-gauge needle (approximately 2 ml effluent and several  
180 lignite particles). The culture vessels were set up in duplicate for each substrate. The cultures  
181 were incubated at 40°C, 55°C or 80°C. Cell growth was determined by microscopic  
182 observation, methane-production and/or acid-production. Isolation of microorganisms from  
183 the enrichment cultures was conducted by serial dilution in liquid culture and/or roll-tubes.  
184 The purity of the isolate was routinely checked by microscopy. The serum vials were sealed  
185 with butyl rubber stoppers and aluminum crimp seals. To monitor anaerobic conditions in the  
186 media, resazurin was added to the medium as a redox indicator. The 16S rRNA gene  
187 sequences of pure cultures were determined as described previously<sup>19</sup>.

188

## 189 **References**

- 190 88. Tandukar, M., Uemura, S., Ohashi, A. & Harada, H. Combining UASB and the ‘fourth  
191 generation’ down-flow hanging sponge reactor for municipal wastewater treatment. *Water*  
192 *Sci. Technol.* **53**, 209–218 (2006).
- 193 89. Ijiri, A. *et al.* Biogeochemical processes involving acetate in sub-seafloor sediments from  
194 the Bering Sea shelf break. *Org. Geochem.* **48**, 47–55 (2012).
- 195 90. Zhang, J., Kobert, K., Flouri, T. & Stamatakis, A. PEAR: a fast and accurate Illumina  
196 Paired-End reAd mergeR. *Bioinformatics* **30**, 614–620 (2014).
- 197 91. Caporaso, J.G. *et al.* QIIME allows analysis of high-throughput community sequencing  
198 data. *Nat. Meth.* **7**, 335–336 (2010).
- 199 92. Edgar, R. C. Search and clustering orders of magnitude faster than BLAST.  
200 *Bioinformatics* **26**, 2460–2461 (2010).
- 201 93. Chen, S. *et al.* AfterQC: automatic filtering, trimming, error removing and quality control  
202 for fastq data. *BMC bioinformatics* **18**, 80 (2017).
- 203 94. Schloss, P.D. *et al.* Introducing mothur: open-source, platform-independent,  
204 community-supported software for describing and comparing microbial communities.  
205 *Appl. Environ. Microbiol.* **75**, 7537–7541 (2009).
- 206 95. Patel, R.K. & Jain, M. NGS QC toolkit: a toolkit for quality control of next generation  
207 sequencing data. *PLoS One* **7**, e30619 (2012).
- 208 96. Martin, M. Cutadapt removes adapter sequences from high-throughput sequencing reads.

- 209 *EMBnet j.* **17**, 10–12 (2011).
- 210 97. Li, K., Bihan, M. & Methé, B.A. Analyses of the stability and core taxonomic  
211 memberships of the human microbiome. *PLoS One* **8**, e63139 (2013).
- 212 98. Nunoura, T. *et al.* Variance and potential niche separation of microbial communities in  
213 subseafloor sediments off Shimokita Peninsula, Japan. *Environ. Microbiol.* **18**,  
214 1889–1906 (2016).
- 215 99. Marsh, T.L., Liu, W.-T., Forney, L.J. & Hans, C. Beginning a molecular analysis of the  
216 eukaryal community in activated sludge. *Water Sci. Technol.* **37**, 455–460 (1998).
- 217 100. Amaral-Zettler, L. A., McCliment, E. A., Ducklow, H. W. & Huse, S. M. A method  
218 for studying protistan diversity using massively parallel sequencing of V9 hypervariable  
219 regions of small-subunit ribosomal RNA genes. *PLoS One* **4**, e6372 (2009).
- 220 101. Matsunaga, K., Kubota, K. & Harada, H. Molecular diversity of eukaryotes in  
221 municipal wastewater treatment processes as revealed by 18S rRNA gene analysis.  
222 *Microbes Environ.* **29**, 401–407 (2014).

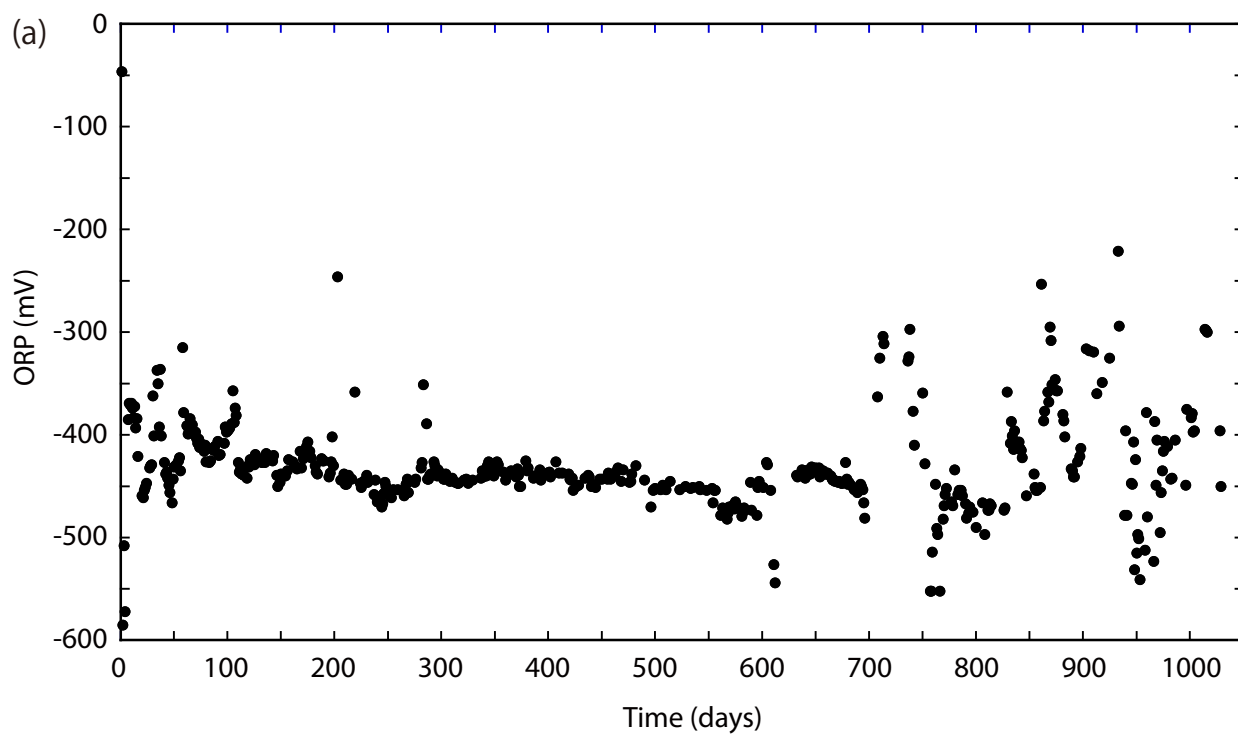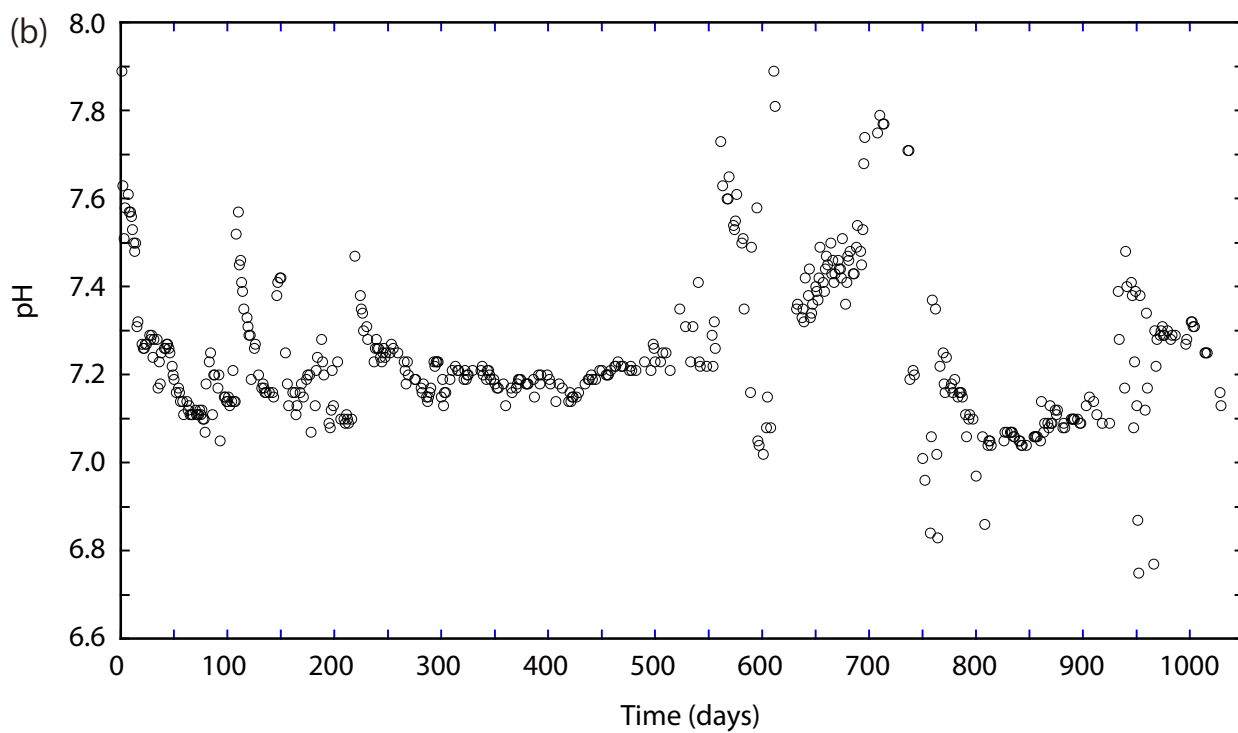

**Fig. S1.** Time-course changes in ORP and pH values of effluent during bioreactor operation. (a) ORP value. (b) pH value.



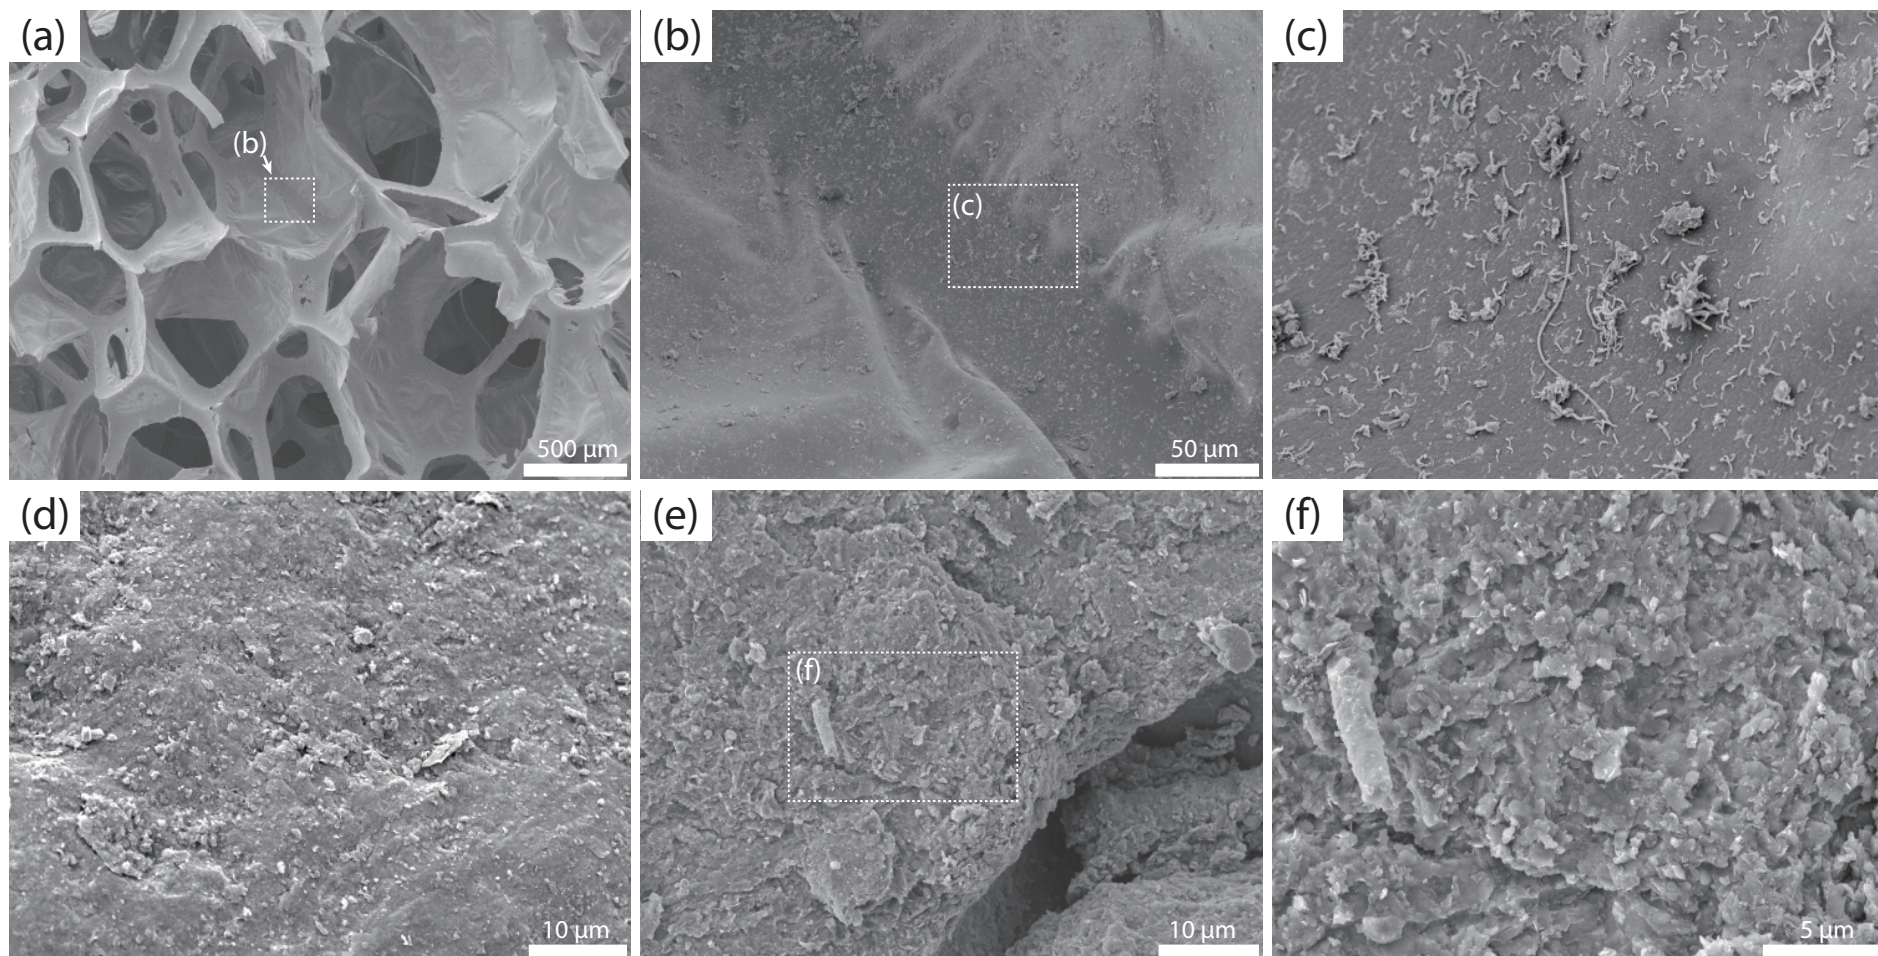

**Fig. S2.** Scanning electron micrographs of a polyurethane sponge carrier that was collected at 694 days of reactor operation and lignite particles before DHS reactor cultivation. (a-c) Polyurethane sponge carrier. (d) 15R-4 lignite sample. (e, f) 25R-5 lignite sample. White dotted-line squares indicate high-magnification areas.

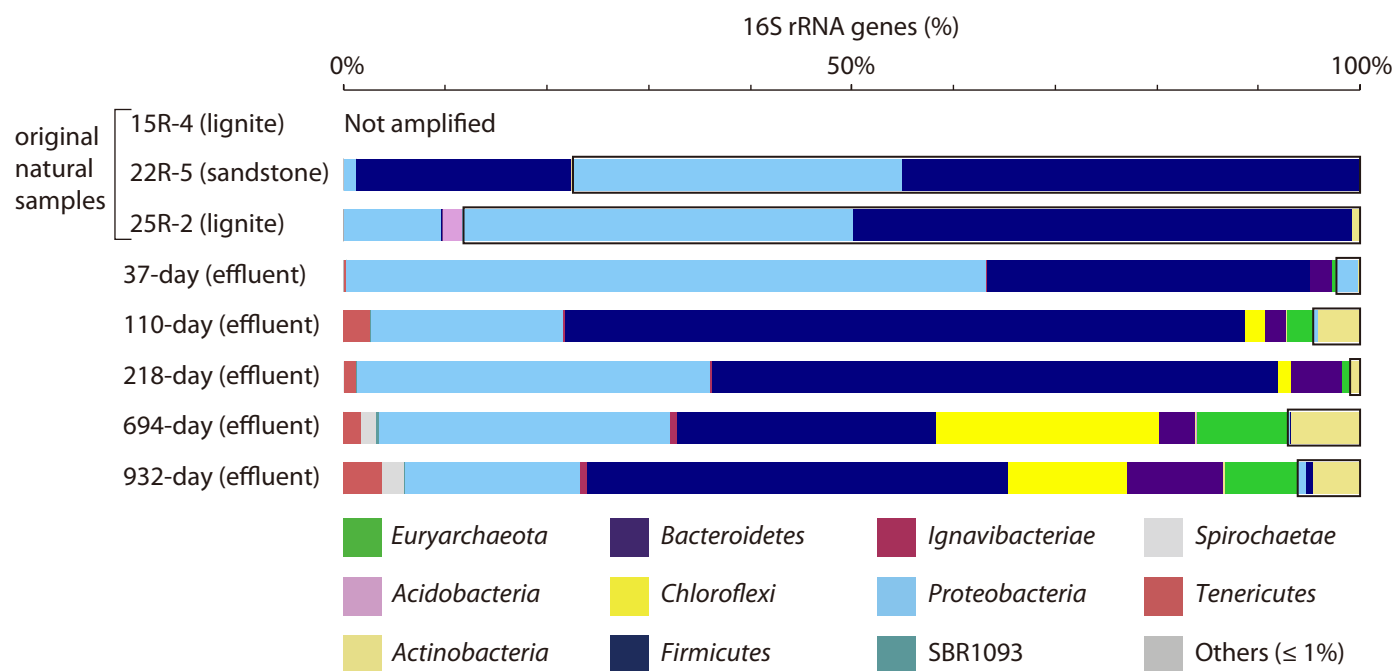

**Fig. S3.** Phylum-level taxonomic composition in original natural samples and effluent samples based on SSU rRNA gene-tag sequencing analyses. Black line boxes indicate potential contaminant populations. For the 15R-4 lignite sample, we performed PCR amplification three times using the extracted DNA. However, no PCR product was obtained.

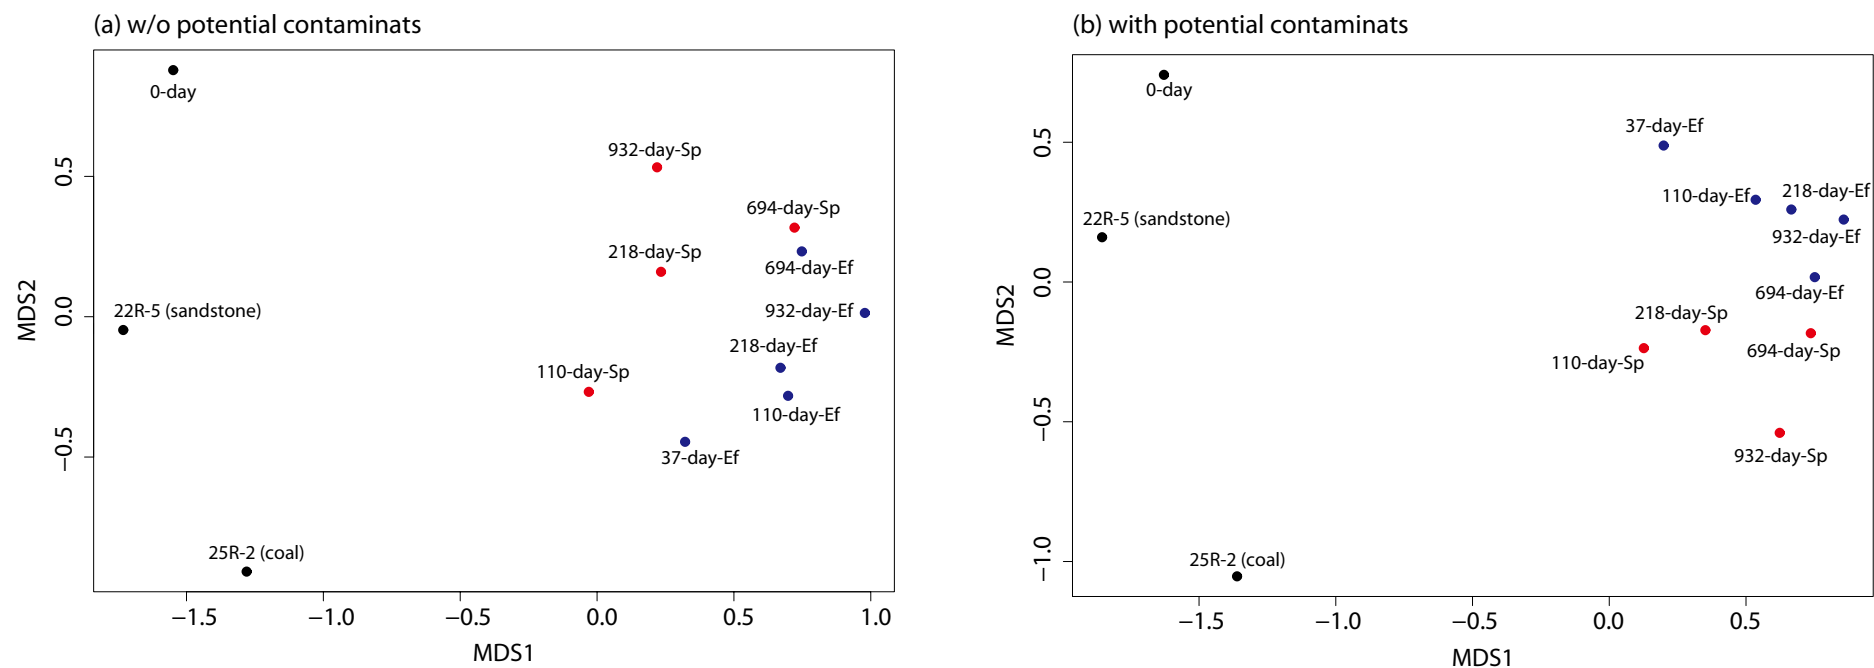

**Fig. S4.** Non-metric multidimensional scaling (NMDS) of the microbial community membership using the Bray-Curtis distance matrix. The name of each sample is composed of the sampling day (0, 37, 110, 218, 694, and 932 days) and an abbreviation of the sampling source (Sp, sponge carriers; Ef, effluent). (a) All sequences without potential contaminant sequences. (b) All sequences including potential contaminants.

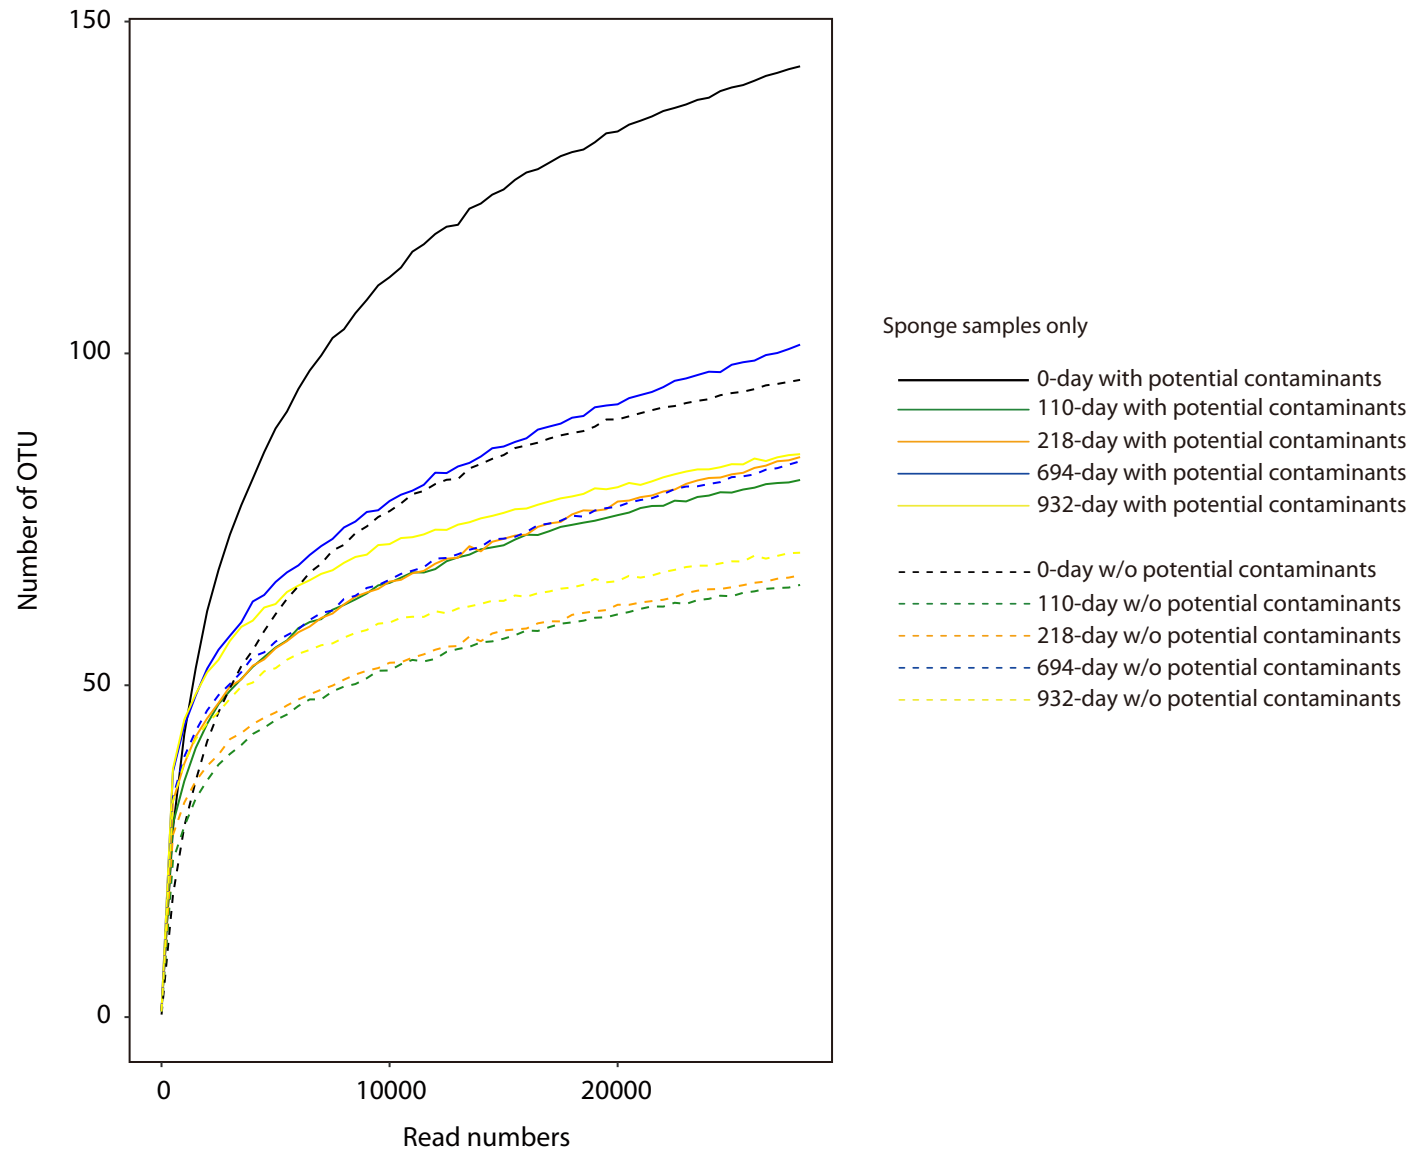

**Fig. S5.** Rarefaction curves representing the relationship between the number of sequences and the number of 97% OTUs identified.
